# Supplementary material
Source: PubMed Central journal article supplement (PMC2725770)
Supplement: me.2008-0103_2.pdf [file me.2008-0103_2.pdf]

**Supplemental table 1. Illumina microarray results from undifferentiated granulosa cells stimulated by FSH or PKA-CQR.** The first column (A) of the spreadsheet shows the Illumina identification numbers for each transcript. The second column (B) shows the accession number for each gene. The next twelve columns (C-N) present the Illumina expression units for each transcript in the three groups of control cells (C-E), the three groups of cells stimulated by FSH (F-H), the three groups of cells infected with the PKA-CQR lentiviral vector (I-K) and the three groups of cells infected with the inactive PKA mutant lentiviral vector (L-N). Columns P-T show the identities and functional information of the individual transcripts. Columns AB-AE present mean values the Illumina expression units for each transcript (n=3) in control incubations (AB) in cells stimulated by FSH (AC) in cell infected with the PKA-CQR lentiviral vector (AD) and cells infected with the C $\alpha$ -mutant lentiviral vector (AE). Column AG shows, for each transcript, the fold increase over control in response to FSH stimulation and column AH shows, for each transcript, the fold increase over control in response to PKA-CQR stimulation.
